# Supplementary material for: Development and validation of a nomogram to predict protein-energy wasting in patients with peritoneal dialysis: a multicenter cohort study
Source: PeerJ. 2023 Jun 5;11:e15507. doi: 10.7717/peerj.15507 (PMC10249631; doi:10.7717/peerj.15507)
Supplement: Supplemental Information 1 — All information of patient characteristics. [file peerj-11-15507-s001.xls]

## Sheet: raw data
id	PEW	gender	age	more_than_65	dialysis_duration	infection	if peritonitis in the last dialysis	number of peritonitis_history before last dialysis	hypertension	diabetes	cardiovascular_disease	Kt_V	Ccr	BUN	SCr	potassium	sodium	calcium	phosphorus	CRP	glucose	TG	VLDL	PTH	pre_dialysis_BUN	ACEI_ARB	ultrafiltration	dataset
1	1	0	53	0	9	0	0	0	0	0	0	1.893	50.156	25.6	922	4.36	140.3	2.26	1.44	1	5.45	1.21	1.37	304	34.6	0	250	0
2	0	0	39	0	101	1	0	2	0	0	0	1.898	41.034	21.6	1128	4.52	137.6	2.42	1.56	0.2	7.5	1.13	1.83	10.2	26.7	0	850	1
3	0	0	36	0	16	0	0	0	1	0	0	2.292	67.04	20.6	980	3.72	144.1	2.28	1.81	1	6.91	5.65	1.91	580.7	35.8	1	100	1
4	0	0	69	1	11	0	0	0	1	0	0	3.061	76.829	15.7	571	3.61	138.7	2.34	0.96	3	5.61	3.31	3.06	132.6	23.2	0	-50	1
5	1	1	60	0	39	1	0	0	0	0	0	2.176	55.223	25.5	1129	4.44	138.7	2.12	1.77	1	5.36	1.32	2.15	834.2	49	0	950	1
6	1	1	58	0	6	1	0	1	1	1	0	2.476	86.531	20	655	4.57	139	2.14	1.52	22	5.47	1.17	3.2	145.3	36	0	-300	1
7	0	1	56	0	92	1	0	1	0	0	0	1.97	60.509	17.8	965	3.53	143.5	2.39	0.71	1	6.18	1.78	1.82	479.2	23	1	560	0
8	1	0	67	1	112	1	0	1	1	0	0	2.585	48.438	14.4	769	4.33	144	2.28	2.14	9.69	6.55	3.23	2.79	442.3	39.9	0	600	1
9	1	1	70	1	87	0	0	0	0	0	0	2.201	71.207	17.2	735	4.98	141.3	2.49	1.18	3	5.32	1.59	3	112.1	21.9	1	50	1
10	0	0	58	0	15	0	0	0	0	0	0	2.147	35.423	22.9	1313	4.15	142.4	2.4	2.32	0.2	5.65	2.55	1.69	199.7	33	0	900	0
11	0	0	48	0	69	0	0	0	0	1	0	2.348	48.716	11.1	1116	3.95	141.1	2.11	1.1	0.2	6.14	2.81	1.38	402.3	44	0	980	1
12	0	1	53	0	18	1	0	0	0	1	0	2.012	82.024	26.2	948	5.73	138.6	2.07	2.15	5	10.66	2.3	1.61	461.1	33.9	0	-150	0
13	0	0	46	0	63	0	0	0	0	0	0	2.117	55.827	16.3	899	3.65	139.8	2.32	1.56	1	5.79	1.34	2.94	1782.1	24.8	1	390	0
14	1	1	39	0	10	0	0	0	0	0	0	1.153	46.241	30.7	1670	4.47	141	2.06	1.65	2	5.67	0.3	1.86	314.2	63.4	1	700	1
15	0	1	36	0	22	0	0	0	1	0	0	1.74	55.363	19.7	1352	4.27	141.3	2.59	1.62	0.2	4.77	2.1	2.54	1011.5	66.4	0	420	1
16	0	1	66	1	63	1	0	1	1	0	0	2.502	67.075	16.7	1033	4.13	144.6	2.38	0.96	0.2	5.62	2.76	2.66	109.8	25.5	1	950	0
17	0	1	57	0	12	1	0	0	0	0	0	1.611	35.883	20.9	1552	4.79	144	2.15	1.66	1	5.22	1.09	1.8	58.8	31.8	0	890	0
18	0	1	51	0	51	0	0	0	1	0	0	1.851	38.095	24.4	1804	5.53	144.7	2.18	2.05	1	5.16	1.33	2.15	787.1	51.6	1	1200	1
19	1	1	68	1	26	0	0	0	0	0	0	2.079	66.53	18.9	999	4.56	141.9	1.82	2.82	8	4.58	0.91	3.08	1534.8	47.1	0	550	1
20	1	0	47	0	12	0	0	0	0	0	0	1.932	44.426	25.9	1092	4.77	138.9	2.15	1.67	0.2	5.2	2.21	2.71	402.9	42.8	0	300	0
21	1	1	62	0	78	0	0	1	1	0	0	1.884	52.502	22.4	1016	4.87	138.9	2.03	1.38	1	5.5	0.82	2.92	409.2	35.6	0	650	1
22	0	1	59	0	72	0	0	2	0	0	0	1.766	47.074	42.4	1256	4.55	143.3	2.24	1.97	1	4.99	1.12	2.06	699.6	33	0	600	0
23	0	0	42	0	17	0	0	0	1	1	0	2.627	111.373	18.8	471	2.98	139.7	2.33	0.91	1	6.41	2.26	3.16	91.8	21.7	1	50	0
24	0	0	50	0	102	0	0	2	0	0	0	2.334	49.852	25.4	1220	3.84	141.9	2.44	1.56	2	5.27	1.13	2.52	124	25	0	800	1
25	0	0	56	0	10	0	0	0	1	0	0	3.045	72.6	19.8	542	3.57	141.6	2.27	1.24	1	5.3	2.16	3.27	428.6	15.9	0	200	1
26	0	0	55	0	111	0	0	2	0	0	0	1.481	39.729	11.7	772	4.21	143.2	2.2	1.61	3	5.64	1.58	2.01	1115.2	26.9	0	200	0
27	1	0	57	0	68	0	0	1	1	0	0	2.258	58.145	21.5	1046	4.1	139.7	2.12	1.22	1	5.99	0.98	2.54	636.8	40.1	1	390	1
28	1	0	72	1	76	1	0	4	0	0	0	2.135	37.82	21.5	720	4.45	135.8	2.26	1.33	17.31	10.94	1.69	2.46	214	25	0	950	1
29	1	0	55	0	75	0	0	1	0	0	0	2.242	56.399	20.2	1054	4.11	144.2	1.94	1.32	2	6.19	2.8	1.14	57.5	29.8	0	790	1
30	0	0	42	0	35	0	0	0	0	0	0	2.124	60.3	20.6	683	3.3	141.8	2.03	2	2	5.85	2.8	3.6	70.5	23.9	0	50	1
31	0	1	67	1	26	1	0	0	1	0	0	1.737	37.572	132.7	925	4.03	141.4	2.06	1.01	1	6.36	2.05	2.98	381	32.4	0	500	1
32	0	1	47	0	33	0	0	1	1	1	0	1.524	38.057	29.3	1706	4.25	139.6	2.41	1.82	0.2	6.9	0.84	1.37	630.8	36.1	0	850	1
33	0	1	62	0	50	0	0	1	0	0	0	1.951	57.804	25.1	1139	4.5	140	2.28	1.63	0.2	5.08	0.97	1.24	479.4	35.3	1	350	1
34	1	1	48	0	30	0	0	0	1	0	0	2.016	63.643	24.5	1250	4.98	140.9	2.11	1.63	0.2	4.81	1.52	2.53	1308.1	35.7	0	200	1
35	0	1	56	0	25	0	0	0	0	0	0	1.883	68.466	26.4	1004	4.57	139.4	2.38	1.56	1	5.97	1.06	2.16	132.5	23.7	0	150	1
36	0	1	47	0	26	0	0	0	1	0	0	2.121	64.01	15.7	1011	4.7	138.1	2.2	1.17	0.2	4.94	1.22	3.73	1043.6	19.3	0	310	1
37	0	1	65	1	68	0	0	0	1	0	0	2.01	54.301	24.8	1083	4.72	136.9	2.35	1.75	1	5.2	0.71	1.42	325.4	20.3	1	700	1
38	0	1	41	0	37	0	0	0	1	0	0	1.379	53.129	20.8	1146	5.35	138.8	2.25	2.39	1	4.92	1.66	2.87	900.8	33.7	1	-150	1
39	0	1	69	1	12	0	0	0	1	0	0	2.155	57.578	19.4	1087	4	140.9	2.13	2.23	3	5.27	2.3	2.07	374.7	30.1	0	500	1
40	1	1	57	0	62	0	0	2	0	0	0	1.733	53.034	39.2	1167	4.96	139.8	2.35	1.24	1	5.6	1.02	3.56	177.9	28	0	390	0
41	1	0	52	0	37	0	0	0	1	0	0	2.799	71.567	38.1	958	4.97	137	2.38	1.86	14	5.57	1.4	3.44	1092.6	35.6	0	450	0
42	0	0	51	0	120	0	0	0	0	0	0	2.24	46.842	16.7	895	2.96	141	2.31	1.45	1	5.48	0.9	5.25	64.4	22.3	0	700	1
43	1	0	57	0	21	0	0	0	1	1	0	1.445	32.722	24.8	994	5.58	141	2.48	2.17	0.2	9	2.32	1.71	260.3	30.4	0	850	1
44	0	0	49	0	0	0	0	0	1	0	0	2.599	99.355	21.6	539	4.58	142.8	2.35	1.32	2	5.49	1.1	2.39	180.7	21.6	0	-350	1
45	1	0	60	0	35	0	0	1	1	0	0	2.177	52.927	36.5	1146	3.25	139.1	2.31	2.01	0.2	5.39	0.64	3.48	364.6	24.7	0	120	1
46	0	0	47	0	121	0	0	0	0	0	0	1.361	35.573	24.2	1383	3.68	138	2.33	2.42	14	6.92	3.3	1.8	1063.1	15.5	0	1050	1
47	0	1	67	1	29	0	0	0	1	0	0	1.875	49.138	18.8	1276	3.01	141.9	2.44	1.99	1	6.07	2.48	3.15	507.3	27	0	1100	1
48	1	0	45	0	14	0	0	0	0	0	0	1.726	42.235	21.7	1309	3.4	139.5	2.38	1.97	0.2	6.01	1.76	3.32	50.6	17.4	0	250	0
49	0	1	49	0	24	0	0	0	1	0	0	1.595	40.922	23.9	1486	4.23	138.9	2.37	1.82	13	4.98	1.86	1.97	395.4	52.5	0	1590	1
50	1	0	50	0	48	0	0	0	0	0	0	1.132	54.391	17.3	853	4.33	134.4	2.37	1.19	1	5.08	0.82	2.95	108.5	24.7	0	550	1
51	0	0	62	0	41	0	0	0	1	0	0	1.812	39.954	29.5	1203	4.3	141.7	2.62	2.11	1	5.43	1.32	1.66	75.1	48.2	1	1100	1
52	0	0	50	0	75	0	0	0	0	0	0	2.104	48.672	15.6	1004	2.84	142.3	2.29	1.52	4	5.91	1.13	3.2	144.8	39.5	0	850	0
53	0	0	51	0	28	0	0	0	1	0	0	2.522	81.429	19.6	766	3.45	143.9	2.39	2.05	20	8.42	4.22	2.36	508	23.7	0	200	0
54	1	1	54	0	93	0	0	0	0	0	0	1.971	53.419	18.3	1378	3.63	141.7	2.55	1.84	1	5.9	1.07	3.03	76	25.9	0	560	1
55	1	1	69	1	3	0	0	1	0	0	0	1.867	54.732	14.1	768	3.36	135.8	2.19	1.17	4	6.57	2.44	1.91	248.6	26.9	0	800	0
56	1	1	53	0	62	1	0	2	1	0	0	1.977	58.068	24.1	1470	3.69	139.1	2.16	1.99	15	7.33	1.24	2.58	637.1	82.1	0	500	1
57	0	1	58	0	65	0	0	0	0	0	0	1.951	46.561	24.7	1331	4.37	138.9	2.28	2.09	1	5.07	1.09	2.58	789.4	40.4	0	780	1
58	1	1	59	0	13	0	0	0	1	0	0	1.545	50.595	37.3	1079	4.57	139.7	2.31	1.45	8	2.86	0.72	3.36	9.1	38.6	0	450	1
59	0	1	58	0	11	0	0	0	0	1	0	1.853	44.62	29.4	1339	6.52	135.4	2.65	1.69	0.2	15.19	4.7	3.6	160.1	40.9	0	1350	1
60	0	0	66	1	38	0	0	0	0	0	0	1.78	36.571	18.8	906	4.33	135.9	2.21	1.59	0.2	6.99	3.71	1.78	1012.8	68.9	0	650	0
61	1	1	62	0	4	0	0	1	1	1	0	1.78	67.914	27	810	5.12	140.4	2.11	2.17	1	5.88	2.25	3.51	295.1	29	1	-400	1
62	1	0	68	1	70	0	0	0	0	0	0	2.043	60.415	10.1	631	3.26	137.8	2.38	0.83	34	5.74	1.45	4.22	132.3	24	0	600	0
63	0	0	59	0	30	0	0	0	0	0	0	1.848	38.502	22.7	1101	3.24	140.7	2.4	1.01	0.2	5.18	1.92	3.08	127.9	21.8	0	250	1
64	1	1	42	0	37	0	0	0	1	0	0	1.85	65.355	23.7	890	3.5	142.6	1.9	1.33	1	5.41	1.41	2.8	1327.6	48.5	1	150	1
65	1	1	58	0	1	0	0	0	0	1	0	1.65	44.7	16.7	992	3.67	139	2.83	1.55	5	7.09	1.74	2.17	579.5	39	1	1555	0
66	1	1	44	0	42	0	0	1	0	0	0	1.919	46.464	22	1208	3.38	133.8	2.3	1.19	6	6	3.7	3.37	33.8	50.1	1	1050	0
67	0	0	49	0	42	0	0	0	1	0	0	2.494	42.445	20.7	1095	3.83	138.4	2.57	2.14	0	5.76	2.47	4.7	348.8	48	0	750	1
68	0	0	52	0	65	0	0	0	0	0	0	2.889	104.445	26	650	4.05	142.2	2.47	1.45	0.2	5.37	0.73	2.24	492.4	32.4	1	-200	1
69	1	1	55	0	96	0	0	5	0	0	0	1.936	53.72	22.8	868	3.37	136.6	1.8	1.03	1	5.52	1.03	1.96	101.7	25	1	950	0
70	0	1	54	0	8	0	0	0	1	1	0	1.836	77.328	21	718	4.22	141.5	1.95	1.73	1	9.23	0.69	1.15	446.8	24.8	0	1300	1
71	0	1	21	0	2	0	0	0	0	0	0	2.089	75.585	19.4	850	3.73	137.8	2.34	1.25	1	4.82	1.97	2.28	98.2	47.4	1	-200	1
72	1	0	56	0	17	0	0	0	1	0	0	2.39	84.074	18.2	499	3.76	142.3	2.27	1.24	0.2	5.4	1.64	2.32	172.9	32.1	0	500	1
73	0	1	46	0	68	0	0	0	1	0	0	1.839	46.435	19.4	988	3.75	139.8	2.34	1.61	25	5.63	3.16	3.55	489.4	23.9	0	850	0
74	1	1	76	1	8	0	0	0	0	0	0	1.802	60.117	25.6	1011	4.08	139.4	2.14	1.32	1	6.91	1.41	3.35	295.2	33.6	0	650	1
75	1	0	79	1	7	0	0	1	1	0	0	2.298	61.335	24.8	646	5.02	138.7	2.39	1.51	23	5.66	0.89	3.16	155.9	40.2	0	300	0
76	1	1	67	1	107	0	0	0	1	0	0	1.949	48.864	17.6	826	2.93	136.3	2.36	1.27	11	8.42	1.48	3.4	195.2	27.9	0	780	0
77	1	0	82	1	18	0	0	0	0	0	0	1.993	52.26	14.2	712	3.71	141.7	2.09	1.51	0.2	5.32	1.15	2.56	173	28.9	0	160	0
78	0	0	56	0	109	0	0	0	1	0	0	1.99	45.013	18.6	1162	3.77	136.6	2.02	1.86	3	6.69	1.99	3.02	455.9	25.1	0	550	1
79	0	1	50	0	59	0	0	0	1	0	0	1.325	39.946	17.1	1194	6.14	139.1	2.4	2.02	1	5.59	0.81	1.31	480.5	33.6	1	790	0
80	1	1	73	1	13	0	0	0	0	0	0	2.188	52.929	22.6	1126	4.31	131	2.44	1.86	4	5.3	1.09	1.6	486.3	30.9	1	100	1
81	0	1	63	0	13	0	0	0	0	0	0	1.527	40.946	23.7	1269	4.64	143.4	2.26	2.21	12	5.19	1.06	0.89	453.1	29.7	1	950	0
82	1	1	53	0	25	0	0	0	0	0	0	1.676	62.161	18.1	810	3.75	138.6	2.32	1.19	56	6.08	1.47	2.06	825	28.7	1	100	1
83	1	1	33	0	4	0	0	0	1	0	0	1.627	43.511	37.3	1441	3.58	138.1	2.44	1.29	20	6.15	1.95	2.76	64.7	31.6	0	310	0
84	1	1	58	0	24	0	0	0	1	0	0	1.891	71.714	19.9	823	4.1	141.2	2	1.81	5	6.89	1.4	2.31	789.7	27.3	0	-300	1
85	1	0	71	1	36	0	0	2	0	0	0	1.901	50.706	9.8	603	2.14	139.2	1.98	0.87	5	9.52	2.31	2.45	484.2	27.3	0	200	0
86	1	1	61	0	15	0	0	0	1	0	0	2.296	108.905	16.3	638	3.54	141.1	2.31	1.17	0.2	6.16	1.13	1.59	240.4	34.1	1	110	0
87	1	0	58	0	4	0	0	0	1	0	0	2.84	84.293	23.1	635	4.17	141.7	2.34	1.56	0.2	4.79	2.6	3.62	227.7	41.4	0	-80	1
88	1	0	73	1	107	0	0	1	0	0	0	2.136	56.71	13.9	843	5	137.7	2.37	1	2	6.08	1.47	2.08	81.9	20	0	170	1
89	1	0	53	0	61	0	0	2	1	0	0	2.222	60.594	18.7	670	4.08	142.7	2.24	1.48	0.2	6.24	1.49	2.02	477.9	25.2	0	300	0
90	0	0	57	0	34	0	0	0	0	0	0	2.919	82.562	21.7	648	3.66	137.2	2.37	1.34	0.2	6.42	2.45	4.11	621.8	35.7	0	320	1
91	1	1	60	0	1	0	0	0	0	1	0	1.615	46.426	25.9	1017	4.2	137.8	2.38	1.65	25	8.47	2.28	1.14	1422.9	41.7	0	980	1
92	0	1	56	0	97	0	0	0	0	0	0	1.473	42.641	22.1	1288	3.5	141.8	2.17	1.89	5	5.48	1.99	2.52	550.3	25.7	0	800	0
93	0	1	63	0	12	0	0	0	1	1	0	3.557	179.333	16.2	269	4.66	139.7	2.38	1.23	1	6.15	1.66	1.16	168	27.4	0	-50	0
94	1	0	64	0	79	0	0	1	0	0	0	2.432	62.312	24.5	799	3.49	139.5	2.19	1.33	0.2	5.75	2.94	1.75	610.8	28.7	0	350	0
95	0	0	46	0	16	0	0	0	1	0	0	1.824	48.537	18.2	943	4.44	140	2.24	1.66	1	5.07	3.54	3.62	727	35.1	1	980	0
96	0	0	30	0	13	0	0	0	0	0	0	2.042	34.438	20.1	1334	4.66	139.1	2.34	1.95	0.2	4.7	1.09	1.18	57.7	28.6	0	950	0
97	0	1	38	0	1	0	0	0	1	0	0	2.061	77.109	33.3	1364	4.21	139.7	2.06	2.43	13	5.34	1.48	2.2	434.7	62.5	0	300	0
98	1	0	50	0	73	0	0	0	0	1	0	2.235	68.601	17.4	847	4.32	137.8	2.1	1.81	1	8.32	0.93	2.23	530.4	24	0	200	0
99	0	1	68	1	74	0	0	0	1	0	0	1.612	40.506	24.3	1346	3.67	135.4	2.25	2.28	8	6.04	1.27	3.07	1095.4	20.5	1	600	1
100	1	1	56	0	110	0	0	0	0	0	0	1.789	59.851	17.2	1147	4.28	141	2.05	2.06	5	5.03	0.77	1.9	1692.3	53.2	1	780	1
101	0	1	36	0	11	0	0	0	0	0	0	1.721	46.122	14	1582	3.08	135.6	2	1.23	0.2	4.92	1.9	2.62	76.5	31	0	1555	1
102	0	1	46	0	12	0	0	0	1	0	0	2.388	72.843	21.6	1116	3.89	139.4	2.27	1.1	1	6.22	0.72	2.33	340.3	38.8	0	10	1
103	0	1	32	0	39	0	0	0	0	0	0	1.567	48.317	28.6	1712	3.35	141.7	2.02	2.51	0.2	4.84	0.81	1.97	285	49.4	1	900	0
104	0	1	43	0	43	0	0	0	1	0	0	1.906	46.419	33.6	1396	3.34	140.6	2.41	2.2	30	6.68	8.26	0.85	1059.1	41	0	2510	1
105	0	1	53	0	16	0	0	0	1	0	0	1.966	58.499	30.9	1214	4.53	141.3	2.13	1.45	0.2	5.86	0.84	2.68	680.5	25.8	0	550	1
106	0	0	58	0	1	0	0	0	0	0	0	2.44	61.309	17.3	925	3.35	139.1	2.35	1.87	0.2	5.69	2.82	1.93	517.4	17.3	0	700	0
107	1	0	59	0	1	0	0	0	1	0	0	2.839	89.65	11.6	557	3.21	140.7	2.04	1.38	2	4.4	1.33	2.09	495.7	33	0	-500	0
108	1	0	70	1	13	0	0	0	1	0	0	1.956	55.342	15.6	561	2.89	138.2	2.22	1.29	2	4.72	1.53	3.93	170.1	16.2	0	550	1
109	0	1	62	0	123	0	1	0	0	0	0	1.517	41.63	22.8	892	3.14	137.1	2.05	1.29	10	5.62	1.1	1.23	122.4	35.4	0	750	1
110	0	0	55	0	71	0	0	2	1	0	0	1.635	33.851	14.4	1032	4.92	141.3	2.1	1.54	12	6.47	4.71	1.53	1215.3	22.4	0	1000	1
111	0	0	61	0	3	0	0	0	0	0	0	3.922	109.549	21.8	626	3.34	141.2	2.46	1.79	0.2	5.61	1.64	2.42	384	27.2	0	220	1
112	0	0	53	0	118	0	1	0	0	0	0	2.319	50.081	24.5	889	3.71	139.1	2.4	1.97	10	9.5	2.43	1.86	199.4	13	0	980	0
113	0	1	69	1	22	0	0	0	0	0	0	2.225	87.718	26.7	518	3.47	138.2	2.37	1.51	2	5.46	1.82	4.06	185.6	35.2	0	180	0
114	1	1	70	1	22	0	0	0	1	0	0	2.659	108.798	21.9	631	5.08	145.1	2.23	1.32	3	7.85	0.74	3.95	95.8	31.6	1	-100	0
115	0	1	47	0	1	0	0	0	0	0	0	1.483	43.142	23.8	1720	4.26	137.7	2.42	1.45	1	5.2	2.19	2.31	19.8	25.1	0	1100	1
116	1	1	49	0	34	0	0	0	0	0	0	1.895	59.502	34.9	1203	4.11	137.2	2.18	1.86	2	5.61	0.88	4.08	1231.6	50.3	0	590	0
117	1	0	55	0	54	0	0	0	0	0	0	2.155	48.057	27.2	992	5.19	139.5	2.32	2.13	0.2	5.42	1.58	2.8	181.8	16.9	0	800	1
118	1	0	56	0	1	0	0	0	1	0	0	2.632	72.263	17.9	586	3.36	139.5	2.28	1.42	0.2	5.37	3.16	1.47	12.4	32.8	0	-200	1
119	1	1	53	0	2	0	0	0	0	0	0	1.686	66.656	22.6	637	4.54	137.6	1.92	0.94	1	5.77	0.58	0.46	488.9	32.9	0	-200	1
120	1	1	28	0	6	0	0	0	0	0	0	1.637	57.295	24.4	1364	4.21	139.6	2.39	1.46	1	4.85	3.58	1.34	84.9	49.3	1	100	0
121	1	0	66	1	8	0	0	1	0	0	0	2.19	50.868	30.6	956	5.67	141.7	2.31	2.02	1	8.84	0.68	2.06	1081.9	30.6	1	200	0
122	0	1	49	0	71	0	0	0	1	0	0	1.775	43.794	19.9	1213	3.97	142.7	2.34	2.13	0.2	5.31	0.81	2.49	475	25.8	1	980	0
123	0	0	53	0	36	0	0	0	1	0	0	2.206	74.558	22.8	774	3.93	141.3	2.2	1.7	3	5.47	1.43	2.77	802.2	35.7	1	-190	1
124	0	0	60	0	6	0	0	0	0	0	0	2.411	63.848	17.8	663	4.54	141.5	2.24	1.2	1	5.17	3.84	1.14	443.1	26.2	1	300	0
125	0	0	36	0	24	0	0	0	0	0	0	1.986	53.759	17.7	982	3.45	139.2	2.4	1.53	12	5.79	1.25	4.02	241.8	35.7	1	-50	0
126	0	0	60	0	20	0	0	0	1	0	0	1.541	34.951	21.2	1021	3.11	137.5	2.39	2.02	59	6.96	1.9	2.2	1404.1	39	0	690	0
127	0	0	44	0	11	0	0	0	1	0	0	2.304	57.593	19	1086	3.64	139.9	2.37	1.47	0.2	5.12	2.06	3.71	210	25.9	1	500	1
128	0	0	51	0	66	1	0	2	1	0	0	2.059	41.38	27.4	1286	3.52	142.1	2.18	1.48	1	4.92	2.39	2.89	231.2	23.3	0	850	1
129	1	1	51	0	82	0	0	0	0	0	0	2.024	75.506	21.4	830	3.98	141.6	1.98	1.57	0.2	5.05	1.22	2.2	387.4	28.9	1	-100	0
130	0	1	67	1	40	0	0	0	1	0	0	1.707	57.932	20.5	923	4.25	141.7	2.31	1.22	2	5.13	1.23	3.83	273	30	1	250	0
131	1	1	59	0	78	0	0	0	1	0	0	1.69	35.182	32.3	1178	4.22	141.4	1.92	1.25	2	5.73	1.03	2.42	395.4	25.9	1	1000	0
132	0	1	67	1	30	0	0	0	1	0	0	1.81	66.116	18.9	898	5.28	140.6	2.12	1.73	1	5.23	1.09	1.17	477.6	43.2	1	320	0
133	0	0	55	0	35	0	0	0	1	0	0	2.482	66.752	23.5	666	4.22	142.2	2.2	1.65	1	5.34	1.29	2.42	502.3	31.1	0	-250	0
134	1	0	68	1	1	0	0	0	0	0	0	3.527	109.863	10.5	431	3.38	139.6	2.05	1.3	0.2	5.39	0.69	1.56	358.4	21.5	0	-200	1
135	0	0	51	0	71	0	0	0	1	0	0	2.063	39.895	19.3	1269	3.97	140.6	2.36	1.29	4	5.36	1.85	1.92	42	24.2	1	700	0
136	0	0	64	0	11	0	0	1	0	0	0	1.913	54.826	15	775	3.73	138.2	2.37	1.49	27	6.98	1.56	3	500.3	19.7	0	550	0
137	1	0	46	0	1	0	0	0	1	0	0	1.907	55.7	19.3	804	4.63	138.4	2.07	1.05	2	4.36	1.25	2.95	278.8	29.8	0	300	0
138	1	1	30	0	18	0	0	0	0	0	0	1.627	47.011	15.1	1449	3.47	138.4	2.27	0.9	1	5.47	1.94	2.44	523.2	22	0	-250	1
139	0	1	49	0	82	0	0	0	1	0	0	1.856	27.049	21.6	1602	4.12	143.5	1.99	2.2	11	6.88	3.89	1.23	224.5	28.6	0	1700	1
140	0	0	49	0	91	0	0	0	1	0	0	1.935	41.315	24.6	1347	4.98	136.3	2.48	2.76	1	6.68	2.56	3.48	34.2	24.2	1	1200	0
141	0	1	39	0	3	0	0	0	0	0	0	2.216	71.082	17.1	942	3.56	138.5	2.4	1.13	1	5.26	1.33	1.26	969.8	59.9	0	350	1
142	0	0	60	0	94	0	0	2	1	1	0	1.85	41.382	16	1170	3.67	138.1	2.34	2.2	8	9.57	3.21	1.18	62.5	15	0	780	0
143	0	0	68	1	90	0	0	0	0	0	0	2.054	66.92	21.4	861	4.73	138.8	2.37	1.72	0.2	5.63	1.05	1.43	121.8	16.5	1	50	1
144	0	1	42	0	20	0	0	0	1	0	0	1.807	72.779	28.4	1014	5.48	138	2.25	2.07	0.2	5.32	0.59	1.66	445.7	24.9	1	-50	1
145	0	0	46	0	10	0	0	0	0	0	0	1.99	76.191	16.4	725	3.18	140.6	2.19	1.22	5	5.32	1.87	2.62	788.8	28.3	1	50	0
146	0	0	52	0	89	0	0	0	0	0	0	1.657	48.674	15.1	942	4.06	141.1	2.54	1.23	2	5.22	1.47	2.31	324.2	17.1	0	750	1
147	1	0	67	1	12	0	0	0	1	0	0	3.024	121.496	19.3	579	2.98	136.9	2.34	1	202	6.79	1.74	2.31	238.9	23.3	0	-260	0
148	0	1	39	0	5	0	0	0	1	0	0	1.849	54.676	18.1	1315	4.48	139.1	2.18	1.74	1	5.31	1.78	2.4	385	15.4	1	-50	0
149	1	0	68	1	87	0	0	1	0	0	0	2.376	71.417	19.3	692	3.67	142.2	2.26	1.2	1	5.15	1.2	3.22	352.6	13.8	0	-50	1
150	1	0	51	0	9	0	0	0	1	1	0	1.82	49.158	31	916	4.34	138.4	2.27	1.51	3	8.9	2.5	1.77	103.1	23.1	1	300	1
151	0	1	50	0	21	0	0	0	1	0	0	1.551	43.381	30.8	1382	5.99	137.3	2.36	1.61	1	4.53	2	2.6	388.1	36.7	1	980	0
152	0	1	48	0	25	0	0	0	1	0	0	1.395	32.081	37.2	1602	4.95	141.3	2.06	2.3	3	5.01	1.35	2.9	476.4	41.7	1	1000	0
153	1	0	66	1	3	0	0	0	1	0	0	1.969	64.19	14.7	614	3.63	138	2.25	1.78	4	6.03	0.87	2.94	641.4	32.2	0	-200	1
154	1	1	67	1	13	0	0	0	1	0	0	1.626	44.62	20.4	1258	3.8	140.7	2.38	1.47	5	5.23	3.03	2.96	24.3	30.1	1	850	1
155	0	1	74	1	86	0	0	0	0	0	0	1.786	43.818	19	1172	4.36	137.1	2.47	1.67	1	5.24	1.75	0.98	373.2	20	1	550	0
156	0	1	66	1	13	0	0	0	0	0	0	1.84	50.362	25.1	993	4.13	140.3	2.09	2.35	0.2	5.43	0.74	2.18	762.9	15.8	1	850	0
157	1	1	49	0	2	0	0	0	1	0	0	1.238	44.594	30.4	1475	5.83	144	2.02	1.57	5	4.42	0.97	2.57	225.6	11.7	1	-400	0
158	0	0	45	0	41	0	0	0	1	0	0	1.946	49.55	17.6	1146	3.16	140.7	2.68	0.79	0.2	5.85	2.65	3.86	299.8	22.2	1	550	1
159	1	1	63	0	38	0	0	0	0	0	0	2.555	74.195	20.6	622	4.62	139.5	2.29	0.92	0.2	5.31	0.92	2.36	129.9	43.1	1	50	0
160	1	0	60	0	11	0	0	0	0	0	0	2.281	52.123	14.6	888	4.49	140.9	2.34	1.57	1	6.41	0.71	2.89	283.7	31	0	800	1
161	0	1	55	0	30	0	0	0	1	0	0	2.108	78.104	26.5	899	4.6	142.4	2.69	1.55	2	5.26	1.49	2.85	46.9	43.2	0	-250	1
162	1	1	49	0	1	0	0	0	0	0	0	1.868	51.145	17.6	1037	3.83	138.3	2.11	1.4	2	5.83	0.94	1.84	385.4	51.9	0	250	1
163	0	1	40	0	26	0	0	0	1	0	0	1.99	76.829	25.2	1004	4.1	139.7	2.16	2.04	1	5.55	1.99	2.5	295.9	36.7	1	1000	0
164	0	1	67	1	12	0	0	0	0	0	0	1.945	72.947	20.4	808	4.02	140.8	2.31	1.69	3	5.44	1.85	2.96	276.3	29.1	1	250	0
165	0	1	57	0	22	0	0	0	1	0	0	1.447	41.953	29.5	1333	4.08	136.8	2.77	1.95	1	6.06	1.76	2.1	26	39.1	0	600	0
166	0	1	38	0	95	0	0	0	0	0	0	1.626	44.572	22.4	1471	4.03	141.2	2.28	2.01	2	4.88	1.43	2.27	365.3	36.3	0	850	0
167	0	1	56	0	5	0	0	0	0	0	0	2.881	97.039	24.3	777	3.51	137.7	1.97	1.64	0.2	5.99	2.26	2.81	955.9	37.7	0	100	0
168	1	0	65	0	11	0	0	0	0	0	0	1.831	42.446	19.2	1001	5.94	135.7	2.22	1.6	0.2	4.84	2.13	2.94	222.9	20.4	1	650	0
169	0	1	53	0	26	0	0	0	1	0	0	2.2	86.059	21.8	772	4.74	138.6	2.35	1.22	35	7.29	3.14	3	436.5	39.6	1	150	1
170	0	0	47	0	13	0	0	0	0	0	0	2.35	57.016	24.3	771	4.37	139.6	2.46	1.65	0.2	5.88	2.27	2.56	315.1	26.8	1	-100	0
171	0	1	77	1	3	0	0	0	0	1	0	1.804	49.765	17.5	936	4.63	141.3	2.24	1.6	1	8.99	1.02	1.28	406.7	23	1	390	0
172	1	1	65	0	6	0	0	0	1	1	0	2.227	91.599	26.6	601	3.71	138.1	1.92	1.44	3	7.4	1.74	4.34	277	27.8	1	150	1
173	0	1	58	0	2	0	0	0	0	0	0	2.305	96.674	20.1	537	3.59	142.4	1.93	1.6	10	5.73	1.69	2.83	465	20.1	0	285	1
174	0	1	38	0	7	0	0	0	0	0	0	1.98	76.787	26.4	1082	4.11	138.4	2.53	1.06	0	5.1	0.72	1.71	27	26.4	0	150	0
175	0	1	50	0	2	0	0	0	0	0	0	1.717	74.018	12.2	856	3.04	142.5	2.32	1.22	1	5.92	0.65	2.53	182	24.4	0	300	0
176	0	1	59	0	2	0	0	0	0	0	0	3.075	133.899	9.7	457	2.99	141.7	2.33	0.9	1	6.08	1.78	2.45	403	40.7	0	300	1
177	0	0	68	1	2	0	0	0	0	0	0	2.03	81.378	28.6	745	3.55	141	2.17	1.49	1	5.54	1.32	2.56	260	19	0	-790	1
178	0	0	77	1	4	0	0	0	0	0	0	2.86	84.447	10.7	599	4.15	141.6	2.39	0.9	1	7.08	1.63	3.95	100	28.4	0	200	0
179	1	1	48	0	6	0	0	0	1	0	0	1.264	47.35	13	666	4.27	140.8	2.17	1.75	0	6.01	0.86	2.74	286	27.7	1	0	1
180	1	0	70	1	5	0	0	0	0	0	0	2.92	97.542	18.5	585	3.78	142.5	2.18	2.01	1	5.52	1.41	3.53	97	14.2	0	250	1
181	1	1	83	1	7	0	0	0	1	0	0	2.095	72.795	11.7	426	3.97	140.7	2.1	1.34	10	5.71	0.91	2.5	150	25	1	500	0
182	0	0	69	1	7	0	0	0	1	0	0	2.256	64.652	25.9	763	4.09	136	3.67	1.02	0	7.37	2.19	5.37	25	58.2	1	350	1
183	1	0	69	1	8	0	0	0	1	0	0	2.595	80.891	17.3	642	4.24	143	2.33	1.69	4	6.28	1.99	3.9	310	14.8	1	340	1
184	1	0	57	0	9	0	0	0	1	1	0	2.016	50.61	22.7	1280	4.21	141.1	2.1	2.42	1	8.31	1.43	1.53	215	22.3	1	1710	1
185	1	1	57	0	87	0	0	0	1	0	0	1.623	47.099	27.4	1369	3.93	137.1	2.33	0.97	5	5.67	2.82	2.64	65	18.3	1	1200	0
186	0	1	58	0	9	0	0	0	1	0	0	1.56	60.252	24	889	3.35	142	2.25	1.4	2	5.39	2.47	2.95	145	24.1	1	100	1
187	0	0	58	0	10	0	0	0	1	0	0	2.653	83.139	15.7	709	4.13	140.6	2.51	1.38	0	6.96	1.67	3.94	97	16.4	1	500	1
188	1	0	56	0	3	0	0	0	1	0	0	2.045	65.185	18.5	709	3.14	139.7	2	0.83	1	6.14	1.29	2.46	462	20.4	1	-300	0
189	0	1	56	0	73	0	0	0	1	0	0	2.069	71.713	26.8	1548	4.17	140.4	2.29	1.92	4	5.26	1.43	4.09	365	29.3	1	-100	0
190	1	0	59	0	87	0	0	0	1	0	0	1.783	61.72	29.6	1199	4.65	138.6	2.32	1.71	1	5	2.05	4.68	322	26.3	1	700	1
191	0	0	69	1	133	0	0	0	0	0	0	2.099	50.361	17.3	927	3.67	138.6	2.52	1.37	2	6.02	5.08	3.8	580	17.8	0	800	1
192	1	0	47	0	82	1	1	1	1	0	0	1.718	44.741	22.1	1157	3.75	140.6	2.36	2.3	7	5.16	3.98	3.07	616	19.3	1	1800	1
193	1	1	55	0	92	0	0	0	1	0	0	1.853	62.311	20.7	1017	3.76	140.2	2.29	1.5	0	5.47	1.11	3.76	63	25.9	1	0	0
194	0	1	74	1	76	1	1	2	1	0	0	1.929	56.86	11.6	1279	3.54	142	2.43	1.62	9	5.47	6.08	3.35	595	16.1	1	1500	0
195	0	0	51	0	114	0	0	0	0	0	0	2.164	38.98	18.1	1157	3.92	144.3	2.51	2.29	1	5.35	2.2	2.53	156	11.1	0	1830	1
196	0	0	56	0	116	0	0	0	0	0	0	2.272	60.892	11.4	805	4.02	139.9	2.53	0.69	61	7.37	4.06	2.85	381	13.3	0	600	1
197	1	1	62	0	11	0	0	0	1	1	0	1.759	56.711	23.2	1164	4.42	142.6	2.05	1.9	20	12.37	0.81	4.42	274	25.3	1	1000	0
198	1	1	56	0	10	0	0	0	1	1	0	1.996	79.125	12.8	680	4.4	141.9	2.09	1.85	0	10.72	4.4	3.35	356	22.7	1	200	0
199	1	1	82	1	11	0	0	0	1	0	0	1.277	28.099	9.6	608	3.3	145.1	2.18	1.19	6	6.59	3.77	5.33	523	14.8	1	900	0
200	1	0	70	1	11	0	0	0	1	0	0	3.258	96.972	7.5	461	3.27	138.7	2.26	0.92	3	6.56	2.59	3.71	63	26.1	1	-1090	1
201	0	1	62	0	9	0	0	0	1	0	0	1.59	59.488	21.6	848	3.52	139	2.15	1.58	4	5.66	1.51	3.66	225	26.4	1	900	0
202	1	1	54	0	11	0	0	0	1	1	0	1.5	49.568	23.9	1282	3.93	141.7	2.07	1.71	1	6.31	0.94	2.86	87	31.8	1	-220	0
203	0	1	63	0	10	0	0	0	1	1	0	2.151	69.757	18.3	794	4.31	140.2	2.26	1.86	1	13.84	1.62	4.33	400	22.5	1	720	0
204	0	1	70	1	10	0	0	0	1	0	0	1.754	64.369	19.1	1092	3.68	141.5	2.21	1.38	2	6.45	1.73	2.43	385	28.7	1	800	0
205	0	0	74	1	12	0	0	0	1	1	0	2.465	75.008	23	684	4.38	141	2.24	1.81	4	8.33	0.93	3.41	165	23.4	1	300	1
206	0	0	54	0	12	0	0	0	0	0	0	3.105	112.453	17.6	618	3.82	139.9	1.89	1.26	3	5.15	1.17	4.51	410	29.9	0	-760	0
207	0	0	57	1	69	0	0	0	1	0	0	2.188	56.544	11.6	1005	2.96	144.2	2.46	1.03	1	5.81	5.17	3.04	247	17.5	1	400	0
208	0	1	52	0	44	0	0	0	1	0	0	1.89	72.556	22.3	1116	3.45	139.2	2.28	1.18	1	5.77	1.12	3.19	218	21.1	1	0	0
209	1	0	54	0	45	0	0	0	1	0	0	1.748	48.401	13.8	1030	4.95	140.3	2.51	1.3	0	6.14	0.86	2.32	256	20.2	1	700	1
210	0	0	52	0	88	0	0	0	1	0	0	1.705	49.287	21.4	1272	4.52	135.5	2.27	1.76	6	6.94	6.71	2.78	49	19.5	1	1200	1
211	1	1	73	1	54	0	0	0	1	0	0	1.557	42.954	19.3	1307	3.77	140.7	2.43	1.31	30	6.41	1.19	2.59	255	18.3	1	800	1
212	1	0	64	0	98	0	0	0	1	0	0	2.583	50.004	16.2	725	3.97	140.4	2.33	0.84	0	6.57	2.44	3.1	213	21.2	1	169	1
213	0	1	67	1	12	0	0	0	1	0	0	1.591	56.357	16.5	961	4.18	142.4	3.17	1.08	2	6.02	3.01	3.54	11	28.3	1	240	1
214	0	1	81	1	12	0	0	0	1	0	0	1.86	66.085	19.9	758	3.59	141	2.29	1.7	1	6.13	1.46	4.62	73	20.2	1	330	0
215	0	1	44	0	14	0	0	0	1	0	0	1.962	74.214	18.4	811	3.99	141.4	2.13	1.89	1	5.65	0.82	2.58	390	12.6	1	250	1
216	0	1	77	1	12	0	0	0	0	0	0	2.317	97.077	21.5	658	3.24	140	2.03	0.82	5	5.34	1.09	2.3	186	18.7	0	500	0
217	0	1	50	0	12	0	0	0	1	0	0	1.904	60.064	28.5	1235	3.81	137	2.9	0.91	0	5.8	1.2	3.81	24	27.2	1	110	1
218	0	0	69	1	15	0	0	0	0	0	0	3.321	125.924	11.6	480	3.18	143.4	2.02	1.19	0	5.09	0.98	2.99	501	15.6	0	501	0
219	0	0	58	0	13	0	0	0	1	0	0	1.788	53.29	16.9	860	4.51	142.9	2.28	1.57	1	6.02	2.3	4.02	274	26.2	1	300	0
220	1	1	79	1	15	0	0	0	1	0	0	1.83	64.284	15.4	911	3.96	137.8	2.8	0.86	0	6.53	1.2	2.5	33	29.4	1	280	1
221	1	0	80	1	15	1	1	2	0	0	0	1.943	55.013	22.5	742	4.88	137.8	2.15	2.02	1	6.71	1.24	4.1	153	37.8	0	887	0
222	0	1	59	0	16	1	1	3	0	0	0	1.708	57.466	16.8	888	4.15	138.7	2.51	0.65	5	6.62	1.47	3.54	54	57.6	0	-270	1
223	0	0	56	0	17	0	0	0	1	1	0	2.642	92.074	14	723	4.15	140.8	2.53	1.42	2	12.21	1.55	4.54	67	23.8	1	-100	0
224	0	1	62	0	17	1	1	2	1	1	0	1.7	69.167	27.8	410	4.63	143.3	2.4	1.79	0	7.33	0.91	2.56	26	29.7	1	800	0
225	0	0	60	0	18	0	0	0	1	1	0	2.52	91.927	11.6	1071	3.79	140.8	2.28	1.16	1	14.34	3.74	5.26	74	13.2	1	800	1
226	0	0	58	0	18	0	0	0	1	1	0	1.941	48.721	24.1	892	5.13	141.5	1.88	1.57	0	11.47	0.94	2.29	409	29.9	1	250	1
227	0	0	51	0	25	0	0	0	0	1	0	2.682	97.395	24.8	438	3.32	139.6	2.32	1.28	0	8.83	1.87	3.84	281	24.4	0	-175	0
228	1	1	70	1	19	0	0	0	0	0	0	1.805	71.123	18.6	857	5.07	145.1	2.16	1.3	0	4.73	0.76	1.97	140	27.7	0	160	1
229	1	0	67	1	19	0	0	0	0	0	0	2.963	81.277	19.7	725	4.7	142.6	2.31	1.25	0	5.62	1.86	3.71	11	33.1	0	50	0
230	0	0	54	0	19	0	0	0	1	0	0	2.772	97.515	9.2	544	3.53	140.5	2.34	1.02	1	5.9	4.31	4.82	363	24.3	1	120	1
231	1	0	74	1	20	0	0	0	0	0	0	1.627	36.496	10.7	1145	3.3	143	2.24	1.5	9	7.35	1.63	2.53	296	38.6	0	665	1
232	1	0	68	1	21	0	0	0	0	0	0	2.228	81.695	21.5	691	4.01	141.4	2.39	0.77	5	6.96	1.31	4.01	70	29.9	0	110	0
233	1	1	60	0	21	0	0	0	0	0	0	1.656	58.892	11.3	769	5.04	138.7	2.09	1.08	5	7.15	0.68	3.08	53	15.9	0	150	0
234	0	0	53	0	22	0	0	0	1	0	0	2.17	58.922	20.6	1034	4.8	139.4	2.47	1.46	3	5.66	1.94	3.5	545	28.2	1	450	0
235	0	0	32	0	22	0	0	0	1	0	0	2.564	66.861	18.2	1052	3.19	139.4	2.39	1.38	2	6.01	1.16	3.64	217	30.6	1	165	1
236	0	0	50	0	22	0	0	0	0	0	0	2.237	61.196	17.9	815	3.91	142.2	2.33	1.43	5	5.31	3.78	2.83	217	15.4	0	0	0
237	0	1	66	1	24	1	1	4	0	0	0	2.265	80.7	22.1	906	4.2	141.6	2.26	1.38	2	7.37	3.21	4.88	10	31.4	0	0	1
238	0	0	66	1	24	0	0	0	1	1	0	2.25	52.511	10.7	721	3.96	137.9	2.24	1.54	2	12.31	4.93	3.68	202	20.3	1	500	1
239	0	1	51	0	24	0	0	0	1	0	0	2.887	125.442	16.1	667	4.04	140.7	2.32	1.13	2	5.02	0.95	2.4	195	24.7	1	0	1
240	1	0	72	1	26	0	0	0	0	0	0	1.888	58.284	20.1	816	4.03	141.7	2.09	1.42	3	6	0.98	3.25	66	14.3	0	280	1
241	0	1	59	0	26	0	0	0	1	0	0	2.022	71.905	16	936	3.82	140.5	2.41	1.37	3	5.84	3.8	3.07	287	20.4	1	315	1
242	1	1	67	1	26	0	0	0	1	0	1	1.569	47.105	23.3	1210	4.31	139.6	1.95	1.09	2	5.09	0.72	3.43	209	21.1	1	280	1
243	1	1	77	1	26	0	0	0	0	0	0	2.089	64.411	10.7	639	3.81	141.2	1.92	1.04	2	5.85	0.88	3.27	447	24.5	0	430	1
244	0	1	56	0	30	0	0	0	1	0	0	1.709	55.941	24.3	1366	4	140.1	2.41	2.06	2	6.3	2.07	2.93	367	35.5	1	750	0
245	1	1	49	0	33	0	0	0	1	0	0	1.891	60.866	14.4	1094	3.25	136.1	2.25	1.76	22	4.71	1.11	3.25	305	34.4	1	0	1
246	1	1	67	1	37	0	0	0	1	0	0	2.031	50.99	15.2	774	4.79	141	2.31	1.28	1	5.45	1.93	3.59	301	38.4	1	590	1
247	0	0	42	0	39	0	0	0	1	0	0	2.451	52.766	16	1046	3.57	141.3	2.23	1.75	10	5.91	2.69	2.26	270	25.5	1	800	0
248	0	1	76	1	41	1	1	2	1	0	0	2.188	54.547	11.2	815	3.68	139.8	2.39	1.22	4	5.84	1.77	3.36	96	43.1	1	400	1
249	0	1	59	0	41	0	0	0	1	1	0	1.857	38.588	11.7	1096	3.49	135	2.01	2.22	8	22.41	4.86	3.57	177	28.5	1	950	1
250	1	0	71	1	41	1	1	1	1	0	0	2.397	74.966	17.7	805	4.48	142.2	2.15	1.27	3	3.69	2.36	4.48	198	18.3	1	300	1
251	1	1	69	1	41	0	0	0	1	0	0	1.711	60.358	18.2	855	4.38	143	2.23	1.84	1	5.14	1.92	3.67	131	28.8	1	260	1
252	1	1	62	0	42	1	1	2	0	0	0	2.308	61.286	13.3	1048	3.84	139	2.31	1.42	0	5.93	0.91	2.51	392	15.9	0	350	0
253	1	0	64	0	43	0	0	0	1	0	0	1.857	46.474	23.9	1120	4.59	137	2.27	1.65	7	7.26	6	4.2	289	38.3	1	200	0
254	0	0	58	0	44	1	1	1	1	0	0	2.37	70.168	13.6	667	4.63	136.8	2.56	1.87	1	5.98	3.82	5.12	266	40	1	200	1
255	0	0	69	1	44	0	0	0	0	1	0	2.301	59.983	18.2	1027	3.33	139.6	1.88	1.89	6	13.93	0.97	1.35	446	22.9	0	300	1
256	1	0	76	1	45	1	1	3	1	1	0	1.99	70.537	11.3	664	3.97	140.2	2.19	0.79	4	10.69	2.95	3.58	70	11	1	315	0
257	1	1	60	0	46	0	0	0	1	1	0	1.733	55.019	16.6	787	4.59	139.7	2.14	1.49	3	13.9	3.6	3.36	282	36.5	1	900	1
258	1	0	53	0	47	0	0	0	1	0	0	1.926	42.847	15.1	1048	3.92	143.5	2.26	1.46	1	5.05	1.57	3.54	135	20.5	1	207	0
259	1	0	74	1	47	0	0	0	0	1	0	1.702	39.116	17	1018	3.67	134.6	2.05	1.71	2	18.26	1.24	3.66	341	20.4	0	20	1
260	1	0	65	1	48	1	1	1	1	0	0	1.97	69.881	10.3	580	3.63	142.1	2.35	1.4	1	4.96	1.12	3.63	103	26.2	1	62	0
261	1	0	75	1	48	0	0	0	1	0	0	1.723	42.277	22.8	911	4.35	139.7	2.19	3.18	23	8.94	1.65	3.39	453	26	1	300	1
262	0	0	58	0	49	1	1	2	1	0	0	2.338	69.485	12.4	642	3.47	140.5	2.32	1.08	16	5.15	1.28	43	68	25.2	1	300	1
263	1	0	65	1	50	1	1	5	1	0	0	1.667	48.412	19.7	692	5.06	140.1	2.2	1.06	0	4.86	0.86	1.95	293	24.5	1	380	1
264	0	0	58	0	67	1	1	1	1	0	0	2.355	55.053	11.9	888	3.84	143.9	2.42	0.93	1	5.66	1.21	3.69	244	12.4	1	350	1
265	0	0	56	0	98	0	0	0	1	0	0	1.783	49.206	19	1084	4.12	139.5	2.18	1.8	3	6.55	2.04	2.36	79	19.3	1	700	0
266	0	0	57	0	71	0	0	0	1	0	0	1.857	49.719	9.2	898	3.15	142.3	2.11	1.44	7	5.18	2.48	2.58	411	25.7	1	800	0
267	1	1	63	0	73	1	1	3	0	0	0	1.759	58.825	17.7	1319	3.44	137.9	2.1	1.55	6	6.01	0.65	1.62	309	19	0	700	1
268	0	1	57	0	75	1	1	1	1	0	0	1.568	48.155	16.2	1150	4.8	141.9	2.44	1.71	0	5.12	0.79	3.19	194	26.2	1	1000	1
269	0	0	82	1	78	0	0	0	1	1	1	1.97	40.744	17.9	849	3.82	139.1	2.32	1.38	1	14.11	1.91	1.74	201	11.8	1	460	1
270	1	1	68	1	78	0	0	0	1	0	0	1.909	68.307	14.7	1007	4.12	139.3	1.98	1.23	2	5.72	0.53	2.86	247	50.2	1	800	0
271	0	1	81	1	80	1	1	2	0	0	0	1.612	54.136	12.4	1052	3.58	139.3	2.18	1.75	11	5.65	2.55	3.78	278	21.5	0	80	0
272	0	1	68	1	81	0	0	0	1	0	0	1.825	45.089	11.3	1129	5.06	142.9	2.48	1.46	2	6.24	1.11	3.45	422	15.5	1	700	1
273	1	0	65	1	82	0	0	0	1	0	0	2.74	49.662	18.4	885	3.75	142.6	1.77	1.17	3	4.07	1.44	1.7	255	13.4	1	900	1
274	1	0	58	0	82	0	0	0	1	0	0	1.976	51.664	21.8	1100	4.97	138.8	2.47	2.25	7	6.9	3.35	3.33	286	19.6	1	790	1
275	0	0	68	1	90	0	0	0	1	0	0	1.924	50.851	16.1	790	3.41	136.7	2.28	1.12	0	5.12	2.63	2.86	420	34.1	1	680	0
276	1	0	65	1	91	0	0	0	1	0	0	2.003	48.504	15.2	811	3.52	144.8	2.06	1.43	24	5.53	0.95	3.2	251	16.8	1	860	1
277	1	1	48	0	94	0	0	0	1	0	0	1.511	47.94	30.1	1408	4.52	137.9	1.98	1.41	53	6.99	0.91	2.57	710	31.3	1	710	1
278	0	0	52	0	94	1	1	7	1	1	0	2.005	49.557	18.6	1168	3.91	133.9	2.07	1.49	4	18.84	9.67	2.91	299	24.4	1	1000	1
279	1	0	68	1	95	1	1	1	0	0	0	1.641	49.105	23.6	992	3.74	144.9	2.04	1.81	3	4.56	0.76	2.87	159	18.5	0	800	1
280	1	0	58	0	72	0	0	0	1	0	0	2.393	56.44	23.2	854	3.3	133.8	2.46	1.58	6	5.09	1.81	3.5	104	32.1	1	800	0
281	0	0	38	0	110	0	0	0	1	0	0	1.775	43.554	19.2	1236	3.5	139.6	2.32	1.56	5	5.62	2.51	3.8	180	12.8	1	900	0
282	0	0	42	0	122	1	1	2	0	0	0	2.078	59.869	13.2	920	4	137.5	2.49	1.31	2	5.09	1.18	4.07	372	39.5	0	900	1
283	1	0	66	1	50	0	0	0	0	0	0	1.819	45.4	16.9	958	3.81	141.9	2.22	1.57	8	6.16	1.12	4.07	317	27.6	0	470	1
284	1	0	70	1	51	0	0	0	1	0	0	2.444	77.294	9.3	638	3.55	142.1	2.38	1.25	1	6.01	2.05	4.87	44	20.5	1	-300	1
285	0	0	69	1	54	0	0	0	0	0	0	2.473	70.325	11.2	845	3.07	142.8	2.1	1.31	9	7.94	2.5	2.59	367	30.3	0	220	1
286	1	0	65	1	56	1	1	2	1	0	0	2.67	67.151	18.7	1030	3.2	144.9	2.27	1.76	11	5.72	4.55	3.42	409	16.6	1	875	0
287	1	1	57	0	66	0	0	0	0	0	0	1.741	55.209	21.1	1143	3.97	139.3	2.12	1.53	3	6.04	0.76	2.67	213	25.1	0	200	1
288	0	0	64	0	56	1	1	1	0	0	0	2.152	55.307	17	920	4.46	140.5	2.31	1.38	1	5.05	1.7	3.33	187	24.8	0	236	1
289	0	0	53	0	9	0	0	0	0	0	0	3.354	86.748	15.08	753.4	4.04	144.1	2.16	1.42	2	5.43	1.16	1.97	206	37	0	500	1
290	1	0	47	0	8	0	0	0	0	0	0	2.005	47.938	16.51	833.3	3.68	142.9	2.02	1.46	4	5.02	1.05	2.08	378	38.6	0	600	1
291	0	1	73	1	8	0	0	0	0	0	0	1.712	74.735	13.87	1170.5	3.26	137.1	2.21	1.14	10	5.62	1.66	2.04	173	32.3	0	950	1
292	1	1	52	0	8	0	0	0	1	1	0	1.761	57.661	14.95	607.9	3.99	143.8	2.15	1.14	0	7.27	0.95	1.76	298	32.9	1	-280	0
293	0	0	54	0	8	0	0	0	1	0	0	4.186	140.986	10.71	625	3.6	141	2.15	1.8	8	10.74	5.16	4.09	407	16.69	1	490	1
294	1	0	58	0	9	0	0	0	0	0	0		94.132	20.14	450.3	3.77	138.1	2.47	1.06	0	6.28	1.4	2.83	33	34.15	0	300	1
295	0	1	62	0	7	0	0	0	0	0	0	1.761	52.33	16.19	1290.2	3.63	140.4	2.5	1.34	6	5.32	1.35	3.36	17	23.46	0	450	0
296	0	1	56	0	6	0	0	0	1	1	0	1.055	41.659	41.93	1813.4	3.27	139.5	1.69	2.2	14.32	6.34	2.77	3.27	589	28.16	1	800	1
297	0	1	72	1	3	0	0	0	1	0	0	1.59	48.612	16.59	785.1	4.07	137.7	2.04	1.51	1	11	1.78	4	327	20.56	0	0	0
298	0	1	62	0	6	0	0	0	1	1	0	1.717	50.313	19.3	1191.7	3.01	141.5	1.95	1.69	1	5.55	1.57	2.52	250	45.91	1	400	1
299	1	1	73	1	5	0	0	0	1	0	0	1.899	62.579	14.64	752.1	4.56	138.9	2.24	0.93	1	5.67	1.76	1.5	20	33.43	0	348	0
300	0	1	44	0	9	0	0	0	1	0	0	1.431	44.213	19.47	1297.3	4.37	142.4	2.1	1.52	5	5.25	5.16	3.29	326	21.21	0	200	1
301	0	0	48	0	3	0	0	0	1	0	0	2.18	68.605	8.81	783.7	3.24	138.7	2.36	0.88	0	4.44	2.06	2.65	384	32.76	0	300	0
302	0	0	67	1	7	0	0	0	1	0	0	2.745	79.625	12.05	598.8	4.48	136.6	2.58	0.99	0	5.16	2.3	3.02	28	19.16	0	300	1
303	1	1	87	1	5	0	0	0	0	0	0	2.457	100.48	19.21	1029.4	2.91	136.6	3.36	1.87	3	6.6	1.05	2.03	34	26.12	0	600	1
304	1	1	65	1	9	0	0	0	1	1	0	1.742	62.869	9.46	907.7	3.54	123	1.83	1.8	3	24.98	0.71	1.65	307	12.31	1	600	0
305	0	1	53	0	4	0	0	0	1	1	0	1.735	77.198	12.9	632.7	3.64	143.2	2.07	2.55	1	10.7	1.29	2.78	400	25.92	1	450	1
306	0	0	79	1	4	0	0	0	1	1	0	2.943	111.88	19.1	448.6	3.43	140.9	2.13	1.19	2	18.98	1.94	2.29	172	27.79	1	305	1
307	1	0	70	1	3	0	0	0	1	0	0	2.205	61.923	7.22	524.2	4.02	142	2.02	1.2	3	4.58	1.08	1.87	427	20.31	0	30	0
308	0	0	38	0	3	0	0	0	1	0	0	2.295	84.504	11.98	591.1	3.73	139.9	2.09	1.6	7	6.27	7.94	3.02	530	33.97	0	240	0
309	0	0	58	0	3	0	0	0	1	0	0	2.667	88.584	20.95	531.4	3.96	139.9	2.43	1.72	1	4.82	0.91	2.67	14	34.95	0	-448	1
310	1	1	67	1	10	0	0	0	0	0	0	1.722	56.786	20.22	610.7	3.67	137	1.78	1.1	32	3.49	0.5	2.2	32	43.07	0	870	1
311	1	0	54	0	25	0	0	0	1	0	0	2.551	42.783	16	950	5.8	141.1	2.26	1.69	5	4.93	1.04	2.91	262.4	34.6	0	500	1
312	1	1	77	1	24	0	0	0	1	0	0	2.279	66.185	24	922	4.37	142.5	2.42	1.14	2	6.32	0.99	2.94	36.1	33.6	0	400	0
313	0	1	55	0	23	0	0	0	1	1	0	2.066	58.984	21.1	1016	5.43	141.2	1.9	1.72	1	10.28	1.08	1.02	744.1	24.8	0	550	1
314	1	1	29	0	22	0	0	0	1	0	0	1.756	40.251	24.1	1785	3.2	134	2.89	1.64	5	4.92	2.94	1.18	33.7	49.3	1	850	1
315	1	0	80	1	22	0	0	0	1	0	0	1.904	42.616	25.5	701	4.04	135.9	2.5	1.63	15	6.62	1.26	2.2	274.4	40.2	0	750	0
316	1	1	59	0	22	0	0	0	1	1	0	1.75	50.234	19.2	958	5.43	139.2	2.25	1.48	35	5.57	0.79	1.94	190.6	36	1	300	1
317	1	1	57	0	21	0	0	0	0	0	0	2.897	102.484	21.7	673	2.9	140.4	2.07	1.13	1	6.06	1.36	3.02	602.5	37.7	0	-560	1
318	1	1	40	0	20	0	0	0	1	0	0	1593	62.541	22.6	1318	4.24	142.7	2.29	2.02	4	5.32	1.19	3.05	252.5	18.2	1	500	0
319	1	0	59	0	20	0	0	0	1	0	0	2.84	84.293	23.1	635	4.17	141.7	2.34	1.56	0.2	5.15	2.01	3.18	227.7	34.7	0	-100	1
320	1	1	63	0	20	0	0	0	1	1	0	1.691	57.611	19.9	934	4.98	138.6	2.2	1.16	5	6.54	2.62	2.02	158.3	28.7	1	390	0
321	1	1	34	0	20	0	0	0	1	0	0	1.627	43.511	37.3	1441	4.63	138.1	2.44	1.29	20	6.15	1.95	2.76	64.7	31.6	0	310	0
322	1	0	67	1	19	0	0	0	1	0	0	1.82	44.453	12	681	3.75	138.5	2.41	1.61	2	6.4	1.37	3.01	718.9	33.1	0	750	0
323	1	0	62	0	19	0	0	0	1	0	0	2.337	74.014	16.7	744	4.11	141.7	2.4	1.64	0.2	4.31	2.16	2.16	414.3	27.3	0	190	0
324	1	1	40	0	18	0	0	0	1	0	0	2.005	60.412	17.5	945	3.49	144.4	2.11	1.56	0.2	4.91	0.66	1.29	502.2	59.9	0	500	0
325	1	1	50	0	17	0	0	0	1	0	0	1.71	49.076	20.9	1303	5.88	143.6	2.36	1.77	2	5.15	1.6	3.01	238.5	27.9	1	600	1
326	1	0	57	0	17	0	0	0	1	0	0	2.003	77.54	19.3	593	3.49	141	2.19	1.34	1	4.91	2.14	1.9	129.8	32.8	0	-300	0
327	1	1	22	0	17	0	0	0	1	0	0	1.941	66.572	23.3	1104	5.64	138.2	2.26	1.57	2	5.35	1.73	3.31	261.4	47.4	1	-900	0
328	1	1	55	0	3	0	0	0	1	1	0	0.982	28.825	26.1	1597	5.47	142.5	1.99	2.41	2	5.43	1.1	2.3	297	37.9	1	100	1
329	1	1	54	0	17	0	0	0	1	0	0	2.544	85.772	20.6	724	3.49	138.9	2.48	1.19	7.21	4.41	0.76	0.89	44.4	33.2	0	750	0
330	1	0	69	1	17	0	0	0	1	0	0	2.425	72.214	21.6	561	3.87	140.3	2.17	1.55	0.2	5.11	1.14	2.16	446.2	21.5	0	-650	0
331	0	0	60	0	17	0	0	0	1	0	0	2.133	60.408	16.1	911	3.51	142.3	2.39	1.77	0.2	7.53	2.47	3.27	176.7	33.2	0	300	1
332	1	0	47	0	17	0	0	0	1	0	0	2.611	75.057	14.8	736	4.33	144.4	2.03	1.07	0.2	5.39	1.12	2.8	873.7	29.8	1	490	1
333	0	1	50	0	17	0	0	0	1	0	0	1.92	48.066	20.6	1170	5.09	137.2	2.51	1.41	3	6.07	1.32	2.46	102	51.9	1	750	1
334	1	0	63	0	6	0	0	0	1	0	0	2.244	61.583	11.1	639	3.7	138.7	2.56	1.46	11	6.06	2.32	1.41	460.6	25.7	0	600	0
335	1	1	50	0	16	0	0	0	1	0	0	2.18	75	25.7	954	4.66	138.3	2.37	1.77	3	5.65	1.91	2.78	150.6	47.6	1	250	1
336	1	1	59	0	16	0	0	0	1	0	0	1.339	44.842	34.8	1145	3.92	135.2	2.39	1.2	1	7.12	2.17	3.32	121.9	39.8	0	850	1
337	0	1	52	0	16	0	0	0	1	0	0	2.437	95.14	17.4	760	4.29	138.3	2.35	1.17	4	5	2.85	2.02	170.9	45.1	1	-500	1
338	1	0	57	0	16	0	0	0	1	0	0	1.706	51.41	24.5	1005	4.01	145.6	2.55	1.78	6	4.53	1.72	3.05	149.7	38.8	1	-200	1
339	1	1	57	0	14	0	0	0	1	0	0	2.101	73.909	15.4	820	4.68	142.3	2	1.77	1	5.22	2.15	1.75	422.1	29.9	1	-350	0
340	1	1	52	0	14	0	0	0	1	0	0	2.006	59.777	28.5	1048	3.03	137.5	2.48	1.46	0.2	5.93	1.54	2.33	57.9	43.6	1	500	0
341	1	0	53	0	14	0	0	0	1	0	0	1.724	46.459	13.5	794	3.65	140.6	2.36	1.38	1	5.24	2.68	1.68	111.1	26.8	0	300	1
342	0	0	60	0	13	0	0	0	1	0	0	2.4	60.736	16.5	873	4.37	139.9	2.51	2.34	6	5.78	2.93	2.35	154.4	32.3	1	50	1
343	1	1	72	1	13	0	0	0	1	1	0	2.064	55.495	17.4	754	3.94	141.4	1.93	1.28	2	7.51	1.92	1.98	579.1	31.7	1	190	1
344	1	1	54	0	12	0	0	0	1	1	0	1.799	45.971	25.2	920	6.81	138.7	2.17	1.89	0.2	7.42	0.54	1.62	136.6	33	1	600	0
345	1	1	64	0	6	0	0	0	1	0	0	2.258	44.3	15	1085	4.69	143.1	2.44	1.57	24	6.52	1.29	1.57	30.2	44.7	0	250	1
346	1	1	69	1	12	0	0	0	1	0	0	1.881	74.045	17	590	4.63	141	1.93	1.55	7	5.19	1.43	2.82	266.6	27.3	0	-450	1
347	1	1	56	0	12	0	0	0	1	0	0	1.683	61.671	19.6	828	4.1	142.9	2.46	1.2	7	5.27	6.14	1.04	31.4	33.7	1	80	1
348	1	1	71	1	11	0	0	0	1	0	0	1.97	67.259	31.7	519	4.22	140.2	2.18	1.5	2	5.08	1.46	1.85	734.9	31.6	1	250	1
349	1	1	69	1	10	0	0	0	0	0	0	2.219	75.905	22	597	3.99	141.3	2.3	1.37	9	5.52	1.06	2.39	141.2	19.2	0	400	0
350	1	0	38	0	9	0	0	0	1	0	0	2.608	71.327	23.1	1255	5.37	135	2.2	2.61	7	9.12	4.41	2.18	604.1	29.7	1	360	1
351	1	0	21	0	9	0	0	0	1	0	0	1.951	59.455	22.5	903	3.66	144.4	2.42	1.54	0.2	4.88	1.5	1.66	200.9	22.6	1	-980	1
352	1	0	38	0	8	0	0	0	1	0	0	3.783	38.498	17.9	1136	4.23	141.1	2.16	1.77	1	4.48	1.77	3.7	336.6	24.8	0	700	1
353	1	0	49	0	8	0	0	0	1	0	0	2.1	68.033	19.3	648	3.72	137.5	2.3	1.59	0.2	5.39	1.99	1.64	259.6	33.9	1	200	1
354	0	1	48	0	7	0	0	0	1	0	0	1.655	58.039	26.1	1254	4.46	140	2	1.64	4	5.13	1.04	3.58	1801.6	60.8	1	800	0
355	1	0	58	0	7	0	0	0	1	0	0	2.439	82.501	17.5	574	4.96	138	2.35	1.6	8	6.1	0.77	2.08	63.6	30.9	1	290	0
356	1	1	68	1	7	0	0	0	1	0	0	2.377	79.976	22.5	730	3.54	137.9	2.26	1.48	2	5.5	1.05	3.8	33.7	37.8	0	-100	1
357	1	0	43	0	7	0	0	0	1	0	0	2.556	60.483	21.6	710	4.2	143.1	2.55	1.76	3	5.1	2.01	2.49	234.1	41.4	0	400	1
358	1	0	36	0	5	0	0	0	1	0	0	1.85	49.081	15.1	806	4.52	138.4	2.34	2.4	1	4.57	1.78	1.96	305.2	34.2	0	680	1
359	1	1	55	0	7	0	0	0	1	0	0	1.888	46.229	18.9	1019	3.69	141.2	2.33	1.13	2	5	1.1	1.95	157.6	44.9	1	300	0
360	1	1	59	0	7	0	0	0	1	0	0	1.908	62.613	18.5	718	4.16	139	2.13	1.63	7	5.2	1.18	2.71	295.6	39.1	0	50	0
361	1	1	62	0	6	0	0	0	1	0	0	1.709	75.794	23.8	621	4.59	139.5	2.05	1.36	1	5.99	1.74	1.74	456.7	37	1	300	1
362	1	1	49	0	6	0	0	0	1	0	0	1.426	44.228	24.1	1084	4.73	143.4	1.64	1.99	3	3.64	1.18	1.71	473.6	44.7	1	-260	1
363	1	1	55	0	5	0	0	0	1	0	0	1.747	68.325	19.5	783	3.44	143	2.18	1.77	2	5.87	1.44	4.28	228.2	34.5	0	150	1
364	1	1	48	0	5	0	0	0	1	0	0	1.736	62.018	15.3	791	4.11	131.6	2.2	0.75	0.2	4.48	1.02	2.08	662.5	39.9	0	-200	0
365	1	1	64	0	4	0	0	0	1	1	0	1.899	60.595	26.4	807	4.32	139.5	2.1	2.39	2	5.98	0.57	1.83	341.5	35.9	1	200	0
366	0	1	47	0	4	0	0	0	1	0	0	1.771	58.39	10.9	803	4.93	144.4	2.37	1.13	36	5.16	0.88	2.24	106.3	45.3	0	-100	0
367	0	0	55	0	3	0	0	0	1	0	0	2.135	71.23	29.5	631	4.86	136.7	2.16	1.48	1	5.44	3.06	1.3	765.9	35.8	1	350	1
368	1	0	36	0	3	0	0	0	1	1	0	1.109	42.383	43.9	1123	4.38	141.3	2.14	1.9	4	5.35	1.37	1.73	520.3	58.1	1	-150	1
369	1	0	69	1	55	0	0	0	1	0	0	2.024	48.101	23	793	4.36	137.2	2.15	1.08	0.2	5.42	4.62	1.48	174.2	39.1	1	250	0
													61.4436

## Sheet: code of Categorical variable
PEW	1	YES
	0	No
gender	1	male
	0	female
>65	1	Yes
	0	No
infection	1	Yes
	0	No
if peritonitis in the last dialysis	1	Yes
	0	No
hypertension	1	Yes
	0	No
diabetes	1	Yes
	0	No
cardiovascular_disease	1	Yes
	0	No
RAASi	1	Yes
	0	No
dataset	1	development set
	0	validation set
